# Supplementary material for: Non-metal cocatalyst CNT-modified emerging g-C 3 N 4 for enhanced treatment of waste drilling fluid filtrate
Source: Royal Society of Chemistry journal article supplement (doi:10.1039/d4ra07393b), 2025-01-01
Supplement: d4ra07393b1.pdf [file d4ra07393b1.pdf]

## Supplementary Material

### **Emerging Non-metal Cocatalysts CNT on g-C<sub>3</sub>N<sub>4</sub> for Enhancing the Treatment of Waste Drilling Fluid Filtrate.**

Wenzhe Li <sup>a</sup>, Xudong Wang<sup>a</sup>, Ye Chen <sup>a\*</sup>, Pengcheng Wu <sup>a</sup>, Zhengtao Li <sup>a</sup>, Zhiqiang Wang <sup>a</sup>, Deng Gu <sup>a, b\*</sup>

<sup>a</sup> Engineering Technology Research Institute of PetroChina Southwest Oil and Gas Field Company ,  
Chengdu 610031, China;

<sup>b</sup> State Key Laboratory of Oil and Gas Reservoir Geology and Exploitation, School of Oil and  
Natural Gas Engineering, Southwest Petroleum University, Chengdu, 610500, China

\*Correspondence: chenye\_2020@petrochina.com.cn , dengx202211@163.com (Deng Gu)

## 1 Pre-prepared reagents :

1) Slowly add 100 mL of sulfuric acid to 900 mL of water along the inner wall of a beaker, stir thoroughly, and allow the solution to cool for later use.

2) Add 5.0 g of silver sulfate to 500 mL of the sulfuric acid prepared above, let it stand for 1–2 days, and stir until dissolved.

3) Gradually add 48.0 g of mercuric sulfate, in portions, to 200 mL of the sulfuric acid solution prepared above, stirring until dissolved.

4) (Potassium Dichromate Standard Solution:  $c(1/6 \text{ K}_2\text{Cr}_2\text{O}_7) = 0.500 \text{ mol/L}$ .)

Dry the potassium dichromate at  $120^\circ\text{C} \pm 2^\circ\text{C}$  to a constant weight. Weigh 24.5154 g of potassium dichromate into a beaker, add 600 mL of water, and slowly add 100 mL of the sulfuric acid prepared above while stirring until dissolved. After cooling, transfer the solution to a 1000 mL volumetric flask and dilute to the mark with water, then mix well.

5) (Potassium Dichromate Standard Solution:  $c(1/6 \text{ K}_2\text{Cr}_2\text{O}_7) = 0.160 \text{ mol/L}$ .)

Dry the potassium dichromate at  $120^\circ\text{C} \pm 2^\circ\text{C}$  to a constant weight. Weigh 7.8449 g of potassium dichromate into a beaker, add 600 mL of water, and slowly add 100 mL of sulfuric acid while stirring until dissolved. After cooling, transfer the solution to a 1000 mL volumetric flask and dilute to the mark with water, then mix well.

6) Potassium Dichromate Standard Solution:  $C(1/6 \text{ K}_2\text{Cr}_2\text{O}_7) = 0.120 \text{ mol/L}$ .

Dry the potassium dichromate at  $120^\circ\text{C} \pm 2^\circ\text{C}$  to a constant weight. Weigh 5.8837 g of potassium dichromate into a beaker, add 600 mL of water, and slowly add 100 mL of sulfuric acid while stirring until dissolved. After cooling, transfer the solution to a 1000 mL volumetric flask and dilute to the mark with water, then mix well.

## 2 Preparation of abandoned drilling hydraulic filtrate

The waste drilling fluid is sourced from the Chang-Qing oil and gas field in China (Well No. Long-dong 27-13), with the organic compounds in the waste drilling hydraulic filtrate primarily consisting of sulfonated phenolic resins.

## 3 Photoelectrochemical Performance Test

The photoelectrochemical performance was evaluated using a three-electrode electrochemical workstation, where a platinum electrode served as the counter electrode, a calomel electrode was

used as the reference electrode, and the sample acted as the working electrode. The electrolyte consisted of a 0.2 mol/L Na<sub>2</sub>SO<sub>4</sub> aqueous solution. The working electrode was prepared as follows: 10 mg of the sample was dispersed in 1 mL of anhydrous ethanol via ultrasonic treatment, and the resulting suspension was applied onto fluorine-doped tin oxide (FTO) conductive glass (20 mm x 10 mm x 2 mm) to form a uniform coating of approximately 50 μm thickness. After drying, the FTO glass was sealed with epoxy resin. Open circuit voltage and electrochemical impedance spectroscopy (EIS) measurements were performed within a frequency range of 0.1 Hz to 1 x 10<sup>6</sup> Hz, with an AC amplitude of 0.2 V. The transient photocurrent was measured under irradiation from a 300 W xenon lamp for 500 seconds, with a 100-second interval between measurements.

#### 4 Tables

Table S1. Specific surface area and pore structure characteristic data.

| Sample                               | Surface Area (m <sup>2</sup> /g) | Pore Volume (cm <sup>3</sup> /g) | Pore Size (nm) |
|--------------------------------------|----------------------------------|----------------------------------|----------------|
| g-C <sub>3</sub> N <sub>4</sub>      | 39.453                           | 0.171                            | 3.385          |
| CNT                                  | 159.416                          | 1.407                            | 20.979         |
| g-C <sub>3</sub> N <sub>4</sub> /CNT | 42.191                           | 0.263                            | 12.788         |

Table S2. Values of elements in equivalent circuit resulted from fitting the EIS data in Figure 6(C).

| Sample                                       | R <sub>s</sub> (Ω cm <sup>-2</sup> ) | R <sub>ct</sub> (Ω cm <sup>-2</sup> ) | CPE (F cm <sup>-2</sup> ) |
|----------------------------------------------|--------------------------------------|---------------------------------------|---------------------------|
| g-C <sub>3</sub> N <sub>4</sub>              | 45.12                                | 8795974                               | 1.35126E-5                |
| g-C <sub>3</sub> N <sub>4</sub> /3.0 wt% CNT | 47.25                                | 1478973                               | 1.68924E-5                |
| g-C <sub>3</sub> N <sub>4</sub> /6.0 wt% CNT | 48.21                                | 1387568                               | 1.86345E-5                |
| g-C <sub>3</sub> N <sub>4</sub> /9.0 wt% CNT | 46.57                                | 1453546                               | 2.15678E-5                |

Table S3. The fitting parameters of TRPL decay curves in Figure 6(F).

| Sample                                       | $A_1$     | $\tau_1$ (ns) | $A_2$   | $\tau_2$ (ns) | $\tau_{avg}$ (ns) |
|----------------------------------------------|-----------|---------------|---------|---------------|-------------------|
| g-C <sub>3</sub> N <sub>4</sub>              | 113.24759 | 1.98349       | 0.59925 | 8.27491       | 2.12              |
| g-C <sub>3</sub> N <sub>4</sub> /3.0 wt% CNT | 103.82879 | 1.99331       | 0.91144 | 7.16543       | 2.15              |
| g-C <sub>3</sub> N <sub>4</sub> /6.0 wt% CNT | 108.66965 | 2.0595        | 0.94036 | 7.54381       | 2.22              |
| g-C <sub>3</sub> N <sub>4</sub> /9.0 wt% CNT | 105.20413 | 1.95723       | 1.31081 | 6.79644       | 2.16              |

Comment :  $\tau_{avg} = (A_1\tau_1^2 + A_2\tau_2^2) / (A_1\tau_1 + A_2\tau_2)$

Table S4. The percentage content of C, N, and O elements in each sample was tested by XPS.

| Sample                               | C 1s (%) | N 1s (%) | O 1s (%) |
|--------------------------------------|----------|----------|----------|
| g-C <sub>3</sub> N <sub>4</sub>      | 43.12    | 54.58    | 2.29     |
| CNT                                  | 97.46    | 0.58     | 1.96     |
| g-C <sub>3</sub> N <sub>4</sub> /CNT | 51.93    | 44.74    | 3.34     |

## 5 Figures

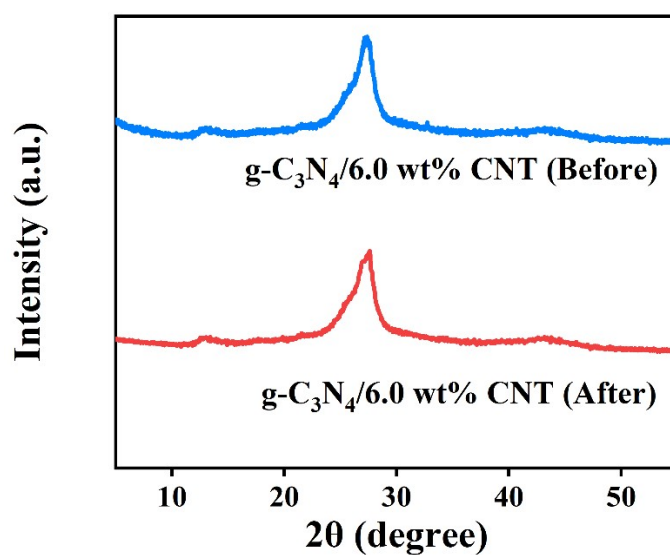

Figure S1. The XRD spectra of catalysts used before and after

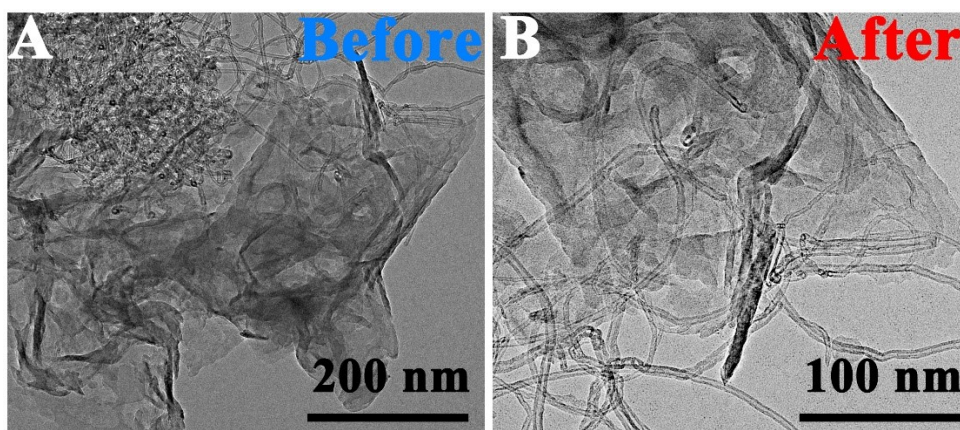

Figure S2. The TEM images of the catalyst being used before and after

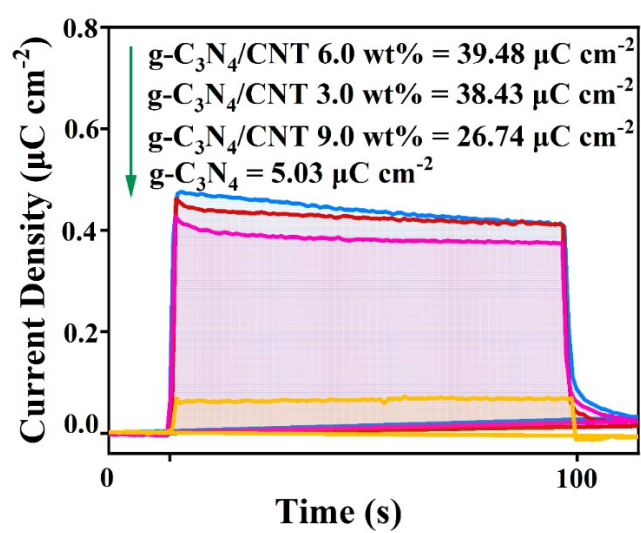

Figure S3. 0-100s transient photocurrent curve area integral plot
